# Supplementary material for: Cardiac Morphology, Function, and Left Ventricular Geometric Pattern in Patients with Hypertensive Crisis: A Cardiovascular Magnetic Resonance-Based Study
Source: MDPI journal article supplement (doi:10.3390/jcdd10090367), 2023-08-27
Supplement: s1 [file s1]

Supplemental Table S1: Comparison of cardiac magnetic resonance imaging findings in subtypes hypertensive crisis.

| Variable                             | Hypertensive crisis (n=82)  |                               |                              |                                 | P value                |
|--------------------------------------|-----------------------------|-------------------------------|------------------------------|---------------------------------|------------------------|
|                                      | Hypertensive urgency (n=18) | Acute pulmonary oedema (n=22) | Myocardial infarction (n=20) | Neurological emergencies (n=22) |                        |
| Age, years                           | 48.4 (15.2)                 | 49.1 (14.3)                   | 54.2 (12.7)                  | 43.1 (9.7)                      | 0.098                  |
| Male, n(%)                           | 5 (27.8)                    | 14 (63.6)                     | 13 (65)                      | 15 (68.2)                       | 0.045                  |
| Systolic BP (mmHg)                   | 215.9 (26)                  | 225.6 (27.3)                  | 202 (25.6)                   | 223.9 (29.1)                    | 0.036*                 |
| Diastolic BP (mmHg)                  | 118.1 (16.1)                | 136.6 (19.1)                  | 117 (17.1)                   | 136 (18.6)                      | <0.001 <sup>abcd</sup> |
| Indexed LV EDV, mL/m <sup>2</sup>    | 64.8 [60–71]                | 109 [91–140]                  | 73.4 [67–98]                 | 66.4 [59– 88]                   | <0.001 <sup>ae</sup>   |
| Indexed LV ESV, mL/m <sup>2</sup>    | 20.7 [15–29]                | 69.7 [54–86]                  | 32.6 [23–53]                 | 28.9 [21–38]                    | <0.001 <sup>abef</sup> |
| Indexed LV SV, mL/m <sup>2</sup>     | 42.6 [39–48]                | 42.9 [35–53]                  | 43.9 [41–48]                 | 40.7 [33–45]                    | 0.628                  |
| LV ejection fraction, %              | 67 [60–74]                  | 38.5 [33–43]                  | 58 [45–65]                   | 58 [54–66]                      | <0.001 <sup>abe</sup>  |
| LV mass, g                           | 156 [130–185]               | 255 [199–299]                 | 187.5 [159–257]              | 216 [146–316]                   | 0.001 <sup>ac</sup>    |
| Indexed LV mass, g/m <sup>2</sup>    | 81.3 [66–103]               | 133.3 [109–166]               | 103.9 [82–134]               | 110 [85–148]                    | <0.001 <sup>ac</sup>   |
| Max wall thickness (mm)              | 13.6 (1.6)                  | 16 (2.4)                      | 14.4 (2.3)                   | 17 (4.4)                        | <0.001 <sup>acd</sup>  |
| LV mass: volume ratio (g/mL)         | 1.22 [1.07–1.55]            | 1.25 [1.04–1.53]              | 1.17 [1.04–1.59]             | 1.54 [1.29–1.87]                | 0.016 <sup>e</sup>     |
| LV hypertrophy, n (%)                | 9 (50)                      | 22 (100)                      | 15 (75)                      | 19 (86.4)                       | <0.001                 |
| Indexed RV EDV, mL/m <sup>2</sup>    | 64.3 [58–67]                | 75.3 [59–95]                  | 71 [59–79]                   | 62.8 [54–74]                    | 0.167                  |
| Indexed RV ESV, mL/m <sup>2</sup>    | 22.7 [16– 28]               | 32 [20–46]                    | 24 [19–32]                   | 22.3 [18–32]                    | 0.154                  |
| Indexed RV SV, mL/m <sup>2</sup>     | 38.3 [37–46]                | 41 [32–50]                    | 41.5 [37–46]                 | 40.3 [33–42]                    | 0.810                  |
| RV ejection fraction, %              | 64.5 [61–73]                | 60 [47–64]                    | 62 [58–69]                   | 63.2 [54–68]                    | 0.104                  |
| Indexed LA volume, mL/m <sup>2</sup> | 31 [28–37]                  | 54.2 [40–62]                  | 43.3 [35–50]                 | 32.3 [27–44]                    | <0.001 <sup>aef</sup>  |
| LGE, n(%)                            | 8/18 (44.4)                 | 11/12 (91.7)                  | 16/18 (88.9)                 | 16/20 (80)                      | 0.008                  |

LV, left ventricular; EDV, end-diastolic volume; ESV, end-systolic volume; SV, stroke volume; RV, right ventricular; LA, left atrial; LGE, late gadolinium enhancement. \* $P > 0.05$  on multiple comparison using Bonferroni Correction; <sup>a</sup> $P < 0.05$  for acute pulmonary oedema versus hypertensive urgency; <sup>b</sup> $P < 0.05$  for acute pulmonary oedema versus myocardial infarction; <sup>c</sup> $P < 0.05$  for neurological emergencies versus hypertensive urgency; <sup>d</sup> $P < 0.05$  for neurological emergencies versus myocardial infarction; <sup>e</sup> $P < 0.05$  for acute pulmonary oedema versus neurological emergencies; <sup>f</sup> $P < 0.05$  for myocardial infarction versus hypertensive urgency.

Supplemental Table S2: Comparison of clinical and cardiovascular magnetic resonance profiles of hypertensive crisis patients based on asymmetric left ventricular hypertrophy.

| Participants characteristics                 | All hypertensive crisis (n=58) | LVH without asymmetry (n=45) | Asymmetric LVH (n=13) | P      |
|----------------------------------------------|--------------------------------|------------------------------|-----------------------|--------|
| <i>Clinical</i>                              |                                |                              |                       |        |
| Age, years                                   | 47.8 (14)                      | 48.5 (14)                    | 45.6 (14)             | 0.688  |
| Male, n(%)                                   | 30 (52)                        | 22 (49)                      | 8 (62)                | 0.534  |
| Body mass index (kg/m <sup>2</sup> )         | 29 [24–36]                     | 29 [24–37]                   | 28 [23–37]            | 0.695  |
| Systolic BP (mmHg)                           | 217 (28)                       | 215 (27)                     | 227 (29)              | 0.198  |
| Diastolic BP(mmHg)                           | 128 (20)                       | 126 (19)                     | 135 (19)              | 0.140  |
| <i>Laboratory</i>                            |                                |                              |                       |        |
| Creatinine (μmol/L)                          | 98 [81–116]                    | 93 [80–116]                  | 108 [82–125]          | 0.386  |
| Platelet count (x 10 <sup>9</sup> /L)        | 285 [257–341]                  | 295 [258–341]                | 284 [255–398]         | 0.590  |
| hs cTnT (ng/L)                               | 17 [11–36]                     | 16 [8–36]                    | 20 [14–47]            | 0.165  |
| NT-proBNP (ng/L)                             | 208 [38–783]                   | 189 [40–838]                 | 275 [41–932]          | 0.618  |
| <i>Cardiac magnetic resonance Parameters</i> |                                |                              |                       |        |
| Indexed LV EDV, mL/m <sup>2</sup>            | 68 [62–91]                     | 70 [62–89]                   | 68 [57–112]           | 0.244  |
| Indexed LV ESV, mL/m <sup>2</sup>            | 29 [21–45]                     | 28 [21–48]                   | 29 [19–58]            | 0.933  |
| Indexed LV SV, mL/m <sup>2</sup>             | 43 [38–48]                     | 44 [37–48]                   | 40 [36–51]            | 0.073  |
| LV ejection fraction, %                      | 60 [51–67]                     | 60 [51–68]                   | 58 [46–66]            | 0.688  |
| LV mass, g                                   | 188 [148–265]                  | 172 [147–239]                | 261 [146–312]         | 0.014  |
| Indexed LV mass, g/m <sup>2</sup>            | 104 [80–129]                   | 98 [77–123]                  | 119 [95–174]          | 0.019  |
| Maximum LV wall thickness (mm)               | 15.6 (3.4)                     | 14.3 (2.4)                   | 19 (3.3)              | <0.001 |
| LV mass: volume ratio (g/mL)                 | 1.35 [1.1–1.64]                | 1.18 [1.1–1.59]              | 1.54 [1.16–1.92]      | 0.005  |
| Indexed RV EDV, mL/m <sup>2</sup>            | 65 [57–75]                     | 66 [60–76]                   | 61 [51–87]            | 0.259  |
| Indexed RV ESV, mL/m <sup>2</sup>            | 23 [18–33]                     | 24 [19–33]                   | 23 [16–39]            | 0.376  |
| Indexed RV SV, mL/m <sup>2</sup>             | 39 [35–45]                     | 41 [36–46]                   | 38 [33–46]            | 0.215  |
| RV ejection fraction, %                      | 63 [58–72]                     | 63 [58–70]                   | 62 [48–72]            | 0.520  |
| Indexed LA volume, mL/m <sup>2</sup>         | 33 [30–47]                     | 34 [30–47]                   | 36 [25–47]            | 0.218  |
| LGE, n(%)                                    | 41 (71)                        | 29 (64)                      | 12 (92)               | 0.082  |

BP, blood pressure; hs cTnT, high sensitivity cardiac troponin T; NT-proBNP, N-terminal prohormone of brain natriuretic peptide; LV, left ventricular; EDV, end-diastolic volume, ESV, end-systolic volume; SV, stroke volume; RV, right ventricular, LA, left atrial; LGE, late gadolinium enhancement.

Supplemental Table S3: Comparison of clinical and cardiovascular magnetic resonance profile of hypertensive crisis patients with and without left ventricular hypertrophy.

| Participant characteristics                  | Hypertensive crisis (n=82) | LVH (n=64)       | No LVH (n=18)  | P      |
|----------------------------------------------|----------------------------|------------------|----------------|--------|
| <i>Clinical</i>                              |                            |                  |                |        |
| Age, years                                   | 48.5 (13.4)                | 48.9 (14.2)      | 47 (9.9)       | 0.680  |
| Male, n(%)                                   | 47 (57.3)                  | 36 (55.4)        | 11 (64.7)      | 0.587  |
| Body mass index (kg/m <sup>2</sup> )         | 27.9 [24–34]               | 26.8 [23–34]     | 30.9 [28–38]   | 0.20   |
| Systolic blood pressure (mmHg)               | 217.2 (28.3)               | 222.3 (26.7)     | 197.8 (26.3)   | 0.002  |
| Diastolic blood pressure (mmHg)              | 127.6 (19.9)               | 131.1 (20.4)     | 113.9 (9.9)    | <0.001 |
| <i>Laboratory</i>                            |                            |                  |                |        |
| Creatinine (micromol/L)                      | 104.5 [84–131]             | 111 [88–174]     | 85 [77–102]    | 0.002  |
| Platelet count (x 10 <sup>9</sup> /L)        | 283 [254–349]              | 283 [253–335]    | 286 [249–361]  | 0.945  |
| hs-cTnT (ng/L)                               | 25 [12–127]                | 35.5 [16–152]    | 8 [6–19]       | <0.001 |
| NT-proBNP (ng/L)                             | 377 [64–1566]              | 534 [180–2077]   | 32 [19–87]     | <0.001 |
| <i>Cardiac magnetic resonance parameters</i> |                            |                  |                |        |
| Indexed LV EDV, mL/m <sup>2</sup>            | 73.7 [63–101]              | 86.1 [66–109]    | 64.2 [60–70]   | <0.001 |
| Indexed LV ESV, mL/m <sup>2</sup>            | 32.2 [22–58]               | 37.9 [24–69]     | 22.2 [18–28]   | <0.001 |
| Indexed LV SV, mL/m <sup>2</sup>             | 43.1 [38–48]               | 43.3 [38–49]     | 42.5 [37–46]   | 0.668  |
| LV ejection fraction, %                      | 57 [42–66]                 | 53 [40–65]       | 64 [59–71]     | <0.001 |
| LV mass, g                                   | 200 [152–273]              | 225 [173–297]    | 147 [126–155]  | <0.001 |
| Indexed LV mass, g/m <sup>2</sup>            | 106.7 [83–140]             | 117.9 [101–153]  | 69.4 [62–77]   | <0.001 |
| Maximum LV wall thickness (mm)               | 15.4 (3.2)                 | 15.9 (3.3)       | 13.3 (1.7)     | <0.001 |
| LV mass: volume ratio (g/mL)                 | 1.3 [1.1–1.6]              | 1.42 [1.13–1.67] | 1.1 [1.0–1.45] | <0.001 |
| Indexed RV EDV, mL/m <sup>2</sup>            | 65.9 [58–78]               | 66.2 [57–79]     | 64.9 [60–73]   | 0.680  |
| Indexed RV ESV, mL/m <sup>2</sup>            | 24.1 [19–34]               | 23.6 [18–36]     | 26.9 [20–32]   | 0.680  |
| Indexed RV SV, mL/m <sup>2</sup>             | 40.4 [35–46]               | 40.4 [35–47]     | 38.5 [36–45]   | 0.740  |
| RV ejection fraction, %                      | 62 [56–67]                 | 62 [54–70]       | 61 [59–66]     | 0.423  |
| Indexed LA volume, mL/m <sup>2</sup>         | 40.3 [30–51]               | 43.8 [31–55]     | 30.3 [29–34]   | 0.001  |
| LGE, n(%)                                    | 52/69 (75.4)               | 44/51 (86.3)     | 7/17 (41.2)    | <0.001 |

hscTnT, high sensitivity cardiac troponin T; NT-proBNP, N-terminal prohormone of brain natriuretic peptide; LV, left ventricular; EDV, end-diastolic volume, ESV, end-systolic volume; SV, stroke volume; ASH, asymmetric septal hypertrophy; RV, right ventricular, LA, left atrial; LGE, late gadolinium enhancement.

Supplemental Table S4: Comparison of clinical and cardiovascular magnetic resonance profile of hypertensive crisis patients with and without nonischaemic LGE.

| Participant characteristics           | Hypertensive crisis (n=58) | No LGE (n=17)   | Nonischaemic LGE (n=41) | P      |
|---------------------------------------|----------------------------|-----------------|-------------------------|--------|
| <i>Clinical</i>                       |                            |                 |                         |        |
| Age, years                            | 47.8 (14)                  | 47.4 (14.2)     | 48 (14.1)               | 0.817  |
| Male, n(%)                            | 30 (51.7)                  | 6 (35.3)        | 24 (58.5)               | 0.151  |
| Body mass index (kg/m <sup>2</sup> )  | 29 [24–36]                 | 27.9 [22–37]    | 29 [25–37]              | 0.343  |
| Systolic BP (mmHg)                    | 217.7 (27.4)               | 207.2 (22.7)    | 222 (28.4)              | 0.092  |
| Diastolic BP (mmHg)                   | 128.2 (19.5)               | 121.5 (18)      | 130.9 (20)              | 0.067  |
| <i>Laboratory</i>                     |                            |                 |                         |        |
| Creatinine (mol/L)                    | 98 [81–116]                | 77 [60–92]      | 108 [88–119]            | <0.001 |
| Platelet count (× 10 <sup>9</sup> /L) | 285 [257–341]              | 304 [263–369]   | 283.5 [256–318]         | 0.295  |
| hs cTnT (ng/L)                        | 17 [11–36]                 | 7.5 [5–17]      | 21 [13–39]              | 0.001  |
| NT-proBNP (ng/L)                      | 208 [38–783]               | 51 [15–151]     | 396 [113–1037]          | 0.001  |
| <i>Cardiac magnetic resonance</i>     |                            |                 |                         |        |
| Indexed LV EDV, mL/m <sup>2</sup>     | 68.4 [62–91]               | 61.8 [58–70]    | 73.5 [63–100]           | 0.009  |
| Indexed LV ESV, mL/m <sup>2</sup>     | 28.6 [21–45]               | 23.1 [17–31]    | 30.8 [21–53]            | 0.069  |
| Indexed LV SV, mL/m <sup>2</sup>      | 42.7 [38–48]               | 39.3 [35–46]    | 43.6 [38–53]            | 0.146  |
| LV ejection fraction, %               | 59.5 [51–67]               | 61 [55–71]      | 58 [45–67]              | 0.191  |
| LV mass, g                            | 188 [148–265]              | 147 [124–170]   | 207 [165–299]           | <0.001 |
| Indexed LV mass, g/m <sup>2</sup>     | 104.3 [80–129]             | 75.2 [62–93]    | 111 [96–142]            | <0.001 |
| Maximum LV wall thickness (mm)        | 15.5 (3.4)                 | 13.5 (1.8)      | 16.4 (3.6)              | 0.001  |
| LV mass: volume ratio (g/mL)          | 1.35 [1.10–1.64]           | 1.13 [1.0–1.57] | 1.43 [1.11–1.74]        | 0.043  |
| LV hypertrophy, n(%)                  | 44 (75.9)                  | 7 (41.2)        | 37 (90.2)               | <0.001 |
| Indexed RV EDV, mL/m <sup>2</sup>     | 65.2 [57–75]               | 63.9 [54–68]    | 66 [58–79]              | 0.228  |
| Indexed RV ESV, mL/m <sup>2</sup>     | 22.7 [18–33]               | 22.5 [19–31]    | 22.9 [16–34]            | 0.986  |
| Indexed RV SV, mL/m <sup>2</sup>      | 38.5 [35–45]               | 37 [30–43]      | 40.4 [36–46]            | 0.169  |
| RV ejection fraction, %               | 63 [58–72]                 | 62 [57–66]      | 64 [58–73]              | 0.393  |
| Indexed LA volume, mL/m <sup>2</sup>  | 33.4 [30–47]               | 29.7 [26–34]    | 40.4 [30–52]            | 0.005  |

BP, blood pressure; hs cTnT, high sensitivity cardiac troponin T; NT-proBNP, N-terminal prohormone of brain natriuretic peptide; LV, left ventricular; LVH, left ventricular hypertrophy; EDV, end-diastolic volume, ESV, end-systolic volume; SV, stroke volume; RV, right ventricular, LA, left atrial; LGE, late gadolinium enhancement.
